# Supplementary material
Source: Springer Nature journal article supplement (https://www.springermedizin.de/resource/supplementary/13012_2012_521_MOESM1_ESM.pdf/9630168)
Supplement: MOESM1 [file 9630168]

2012

2013

2014

2015

Recruitment of practices

Recruitment of patients and baseline data collection (T0)

Data collection after 12 months (T1)

Data collection after 24 months (T2)

Data preparation and analysis

23 practices: intervention group (case management for two years per patient)

Cluster randomization (practice level)

23 practices: control group (usual care for two years per patient)
